# Supplementary material
Source: publisher site journal article supplement (https://www.dovepress.com/get_supplementary_file.php?f=502925.xlsx)
Supplement: Supplementary file 1 [file get_supplementary_file.php]

## Sheet: Sheet1
Supplementary Table 1. The list of differential expressed genes in the dataset of GSE160929.
ID	GENE_SYMBOL	P.Value	logFC
A_55_P2718197	Zfp101	0.00175	2.92507	down
A_55_P2143494	Doc2b	0.00796	2.84268	down
A_51_P279693	Cyp1a1	0.0431	2.78477	down
A_55_P2841792	Gm32017	8.06e-06	2.77283	down
A_51_P261713	Slco1c1	0.00557	2.65825	down
A_55_P2042923	Sgk2	0.00171	2.64378	down
A_55_P2549209	Gm35995	0.000502	2.54778	down
A_55_P2022629	Oxct2b	0.0249	2.52545	down
A_55_P2098494	LOC118568650	3.53e-05	2.51187	down
A_52_P203316	Kcnf1	0.000214	2.46964	down
A_51_P131335	Lrrc66	0.0076	2.46533	down
A_51_P406157	Calcb	3.41e-07	2.44284	down
A_52_P788229	Chchd7	0.0189	2.44152	down
A_51_P441933	Potegl	0.00331	2.43738	down
A_52_P254825	Spata4	0.0416	2.43699	down
A_55_P2942806	Gm31001	0.01	2.43173	down
A_55_P2493443	Abca6	0.00362	2.39547	down
A_55_P2720430	Nfe2l2	0.0122	2.39497	down
A_55_P2550442	Gm32133	0.00486	2.3563	down
A_55_P2031508	1700029H14Rik	0.014	2.27521	down
A_52_P492882	Zdhhc6	0.00317	2.26451	down
A_66_P135244	Ints15	0.00129	2.2468	down
A_55_P2091942	BC061237	0.0125	2.22842	down
A_51_P252988	Isx	0.0225	2.20343	down
A_51_P262645	Npc1l1	0.00528	2.18733	down
A_55_P2276969	C030034L19Rik	1.31e-05	2.18694	down
A_66_P133649	A530013C23Rik	0.0133	2.16418	down
A_66_P108629	N4bp2os	0.00169	2.15223	down
A_52_P239922	Ppef1	0.0106	2.12531	down
A_55_P2146389	Ginm1	0.0022	2.10481	down
A_55_P2319035	AW011956	0.0134	2.10392	down
A_55_P2237440	Gm13999	0.00682	2.09532	down
A_51_P470530	Tex45	0.00506	2.04341	down
A_55_P1957983	Tmem30c	0.00797	1.99654	down
A_51_P482121	Edn2	0.0061	1.99632	down
A_55_P2602450	Fam205c	0.0078	1.98045	down
A_51_P212012	8430419K02Rik	0.00372	1.96793	down
A_55_P2718262	Ptprn2	0.0118	1.96595	down
A_55_P2026572	Fam189a1	0.00184	1.9627	down
A_51_P486188	Pabpc2	0.0468	1.96005	down
A_52_P250637	4930589P08Rik	0.00275	1.95806	down
A_66_P106744	Syce3	0.0129	1.94609	down
A_52_P202180	Ccbe1	0.00435	1.94278	down
A_52_P684087	Atoh7	0.00852	1.93561	down
A_55_P2715156	Tcaf1	0.00615	1.92552	down
A_66_P105270	Hao1	0.00887	1.91617	down
A_52_P381468	Nxph1	0.00503	1.90661	down
A_55_P1957997	Gm15743	0.0349	1.87094	down
A_52_P746506	4930500G05Rik	0.00433	1.86647	down
A_55_P2733362	Tinagl1	0.00602	1.84922	down
A_52_P661159	Gm136	0.0375	1.82854	down
A_55_P2156697	Il17a	0.00327	1.82776	down
A_55_P2293414	1700001C19Rik	0.0334	1.82662	down
A_51_P490337	Tmem190	0.0195	1.82219	down
A_52_P607195	Atp13a5	0.011	1.80868	down
A_55_P2550550	Gm31701	0.0168	1.79623	down
A_51_P471619	Actl7b	0.00177	1.78733	down
A_55_P2417936	AW125324	0.0295	1.78253	down
A_66_P132621	Or13a21	0.001	1.78104	down
A_66_P103811	Gm51460	0.00169	1.77859	down
A_51_P302327	Lgals7	0.037	1.77236	down
A_66_P128926	Adgrf5	0.00598	1.77006	down
A_52_P552560	4930578I06Rik	0.0253	1.75858	down
A_66_P122416	Gm15423	0.0379	1.75203	down
A_52_P385584	Hoxd9	0.000243	1.74862	down
A_65_P07220	Slc25a48	0.0218	1.74406	down
A_55_P2935337	9530036O11Rik	0.0124	1.74161	down
A_55_P2719374	Zbtb38	0.0183	1.73938	down
A_55_P2049797	Orly	0.043	1.72952	down
A_51_P176583	1700109H08Rik	0.00664	1.72937	down
A_66_P123324	Igkv14-100	0.00191	1.72542	down
A_55_P2729993	Cyp2j9	0.0363	1.71848	down
A_52_P898433	2310021N16Rik	0.03	1.71188	down
A_51_P356055	Grp	0.0125	1.71177	down
A_55_P2560669	Gm4633	0.00481	1.70914	down
A_66_P115150	Tcea1	0.0332	1.70311	down
A_51_P462428	Galnt15	0.0463	1.69854	down
A_66_P138834	Gm41121	0.0154	1.69251	down
A_55_P2197418	C80360	0.00313	1.69134	down
A_55_P2742870	Osbp2	0.0296	1.68842	down
A_55_P2135541	Cnpy4	0.000596	1.68651	down
A_55_P2061796	1700122H20Rik	0.000384	1.68316	down
A_55_P2104011	Gm5767	0.00414	1.67654	down
A_55_P2099840	Mindy2	0.00287	1.67474	down
A_55_P2715422	Timp3	0.0217	1.67451	down
A_55_P1990840	Gm20877	0.00909	1.67258	down
A_55_P2725285	Gm20806	0.0302	1.66793	down
A_51_P112465	Piezo2	0.00536	1.665	down
A_55_P2071334	Rrh	0.00271	1.65528	down
A_51_P143040	Or12e7	0.000849	1.65203	down
A_55_P2929291	Lpin3	0.0175	1.64615	down
A_51_P331328	Gpihbp1	0.00997	1.64571	down
A_55_P2147712	Ctla4	0.00192	1.63259	down
A_66_P108066	9330169L03Rik	0.0393	1.63099	down
A_52_P1148677	Gm10322	0.00092	1.62801	down
A_51_P150302	Crtam	0.0258	1.62597	down
A_55_P2715496	1700003F12Rik	0.00374	1.61765	down
A_51_P171180	Ripor3	0.0109	1.61643	down
A_66_P132970	BC049987	0.0304	1.61347	down
A_55_P2720550	Aopep	0.026	1.61305	down
A_52_P620496	Gpr182	0.00483	1.61138	down
A_51_P419656	Klk1b27	0.00261	1.61116	down
A_51_P480861	Pga5	0.00221	1.60629	down
A_52_P490071	Or6c69b	0.000714	1.60114	down
A_55_P2647282	Fmo4	0.00527	1.59821	down
A_55_P2200319	A630014C17Rik	0.0268	1.59737	down
A_52_P645357	Adipor1	0.00358	1.5931	down
A_55_P2183032	Zfp787	0.00344	1.59288	down
A_55_P2075469	Baalc	0.0407	1.58461	down
A_52_P195706	1700024J04Rik	0.000134	1.58239	down
A_51_P133422	Nck2	0.0141	1.58118	down
A_66_P132423	Nr4a3	0.000184	1.58039	down
A_51_P322482	Pkhd1	0.0183	1.57956	down
A_66_P112564	Tmem192	0.0148	1.57836	down
A_52_P193611	Pkd2l1	0.00329	1.57164	down
A_66_P118799	Gm5144	0.0305	1.57109	down
A_55_P2727509	Suv39h1	0.000105	1.56326	down
A_55_P2074908	Ube4b	0.00732	1.56304	down
A_55_P1953938	Tex35	0.00285	1.55857	down
A_51_P234253	Sdcbp2	0.0051	1.55464	down
A_55_P2112927	Pate2	0.0132	1.55425	down
A_55_P2736275	E2f6	0.000951	1.55411	down
A_55_P2621147	Lepr	0.0362	1.55224	down
A_55_P2055262	Chrm1	0.044	1.55069	down
A_52_P121753	Lypd9	0.00255	1.5475	down
A_51_P389120	Egfem1	0.00228	1.54716	down
A_51_P374818	Shd	0.0127	1.54396	down
A_51_P514405	Slc2a5	0.043	1.5397	down
A_55_P2044128	Gm20830	0.00856	1.53368	down
A_55_P2106074	Wfikkn1	0.00151	1.5307	down
A_55_P2492298	Hapln1	0.0314	1.5273	down
A_55_P2054373	Defa-ps1	0.0104	1.52178	down
A_52_P244803	D630033O11Rik	0.00305	1.52016	down
A_55_P2732493	Net1	0.0087	1.51844	down
A_55_P2510462	4930596I21Rik	0.00916	1.51836	down
A_55_P1983688	1700012B07Rik	0.0397	1.51833	down
A_66_P123010	BB283400	0.00696	1.51676	down
A_55_P2633164	Napg	0.00818	1.51631	down
A_55_P2040860	Sun3	0.0146	1.51122	down
A_55_P2056941	Or2a52	0.00176	1.50963	down
A_51_P308397	1700047K16Rik	0.00646	1.50945	down
A_66_P131403	Gm9465	0.014	1.50886	down
A_55_P2051571	Olfr1496	8.17e-05	1.50504	down
A_66_P108429	1700039E22Rik	0.0401	1.5045	down
A_55_P2619560	Crebrf	0.0364	1.5038	down
A_51_P315941	Prkd3	0.00656	1.49999	down
A_55_P2925549	Mbtps2	0.0109	1.49949	down
A_55_P2255196	D7Bwg0826e	0.0169	1.49454	down
A_55_P2721304	Amz1	0.014	1.4932	down
A_55_P2129309	Gm38485	0.00602	1.49304	down
A_51_P277563	Defb22	0.0076	1.49064	down
A_55_P2105878	Ccr10	0.00354	1.48892	down
A_51_P118400	Themis3	0.0163	1.4883	down
A_52_P173703	Myrip	0.0336	1.48374	down
A_55_P2797948	Tmem249	0.00775	1.48368	down
A_55_P2056488	Slc4a9	0.00825	1.48244	down
A_51_P223776	Nr1d1	0.016	1.48074	down
A_51_P260683	Rgs1	0.00271	1.48033	down
A_66_P140223	1810024B03Rik	0.0055	1.47432	down
A_51_P482868	Vmn1r28	0.00424	1.46884	down
A_66_P125352	B230303O12Rik	0.0147	1.46618	down
A_55_P2725677	Gm33187	0.00304	1.4656	down
A_51_P115471	Apol8	0.00398	1.46441	down
A_55_P2055189	Kcng1	0.0173	1.46139	down
A_55_P1953013	Ccser1	0.0203	1.46067	down
A_55_P2036620	Lrif1	0.013	1.45815	down
A_55_P2739435	Vps33b	4.43e-05	1.45721	down
A_55_P2028382	Gm3134	0.0262	1.45119	down
A_55_P2165994	Tbc1d9	0.000114	1.44987	down
A_52_P628127	Fam229a	0.00788	1.44862	down
A_55_P2116788	Odf4	0.00214	1.44798	down
A_55_P2143499	Pgbd5	0.0225	1.44782	down
A_55_P2713930	Zfp111	0.0011	1.44321	down
A_66_P126459	Gm13429	0.0102	1.43976	down
A_52_P525207	C130073F10Rik	0.0054	1.43879	down
A_55_P2044547	2810416G20Rik	0.00583	1.43724	down
A_55_P2083153	1700001J03Rik	0.0377	1.43652	down
A_52_P237973	Olfr170	0.00451	1.43605	down
A_52_P618807	Crk	0.00162	1.43592	down
A_55_P2918909	Steep1	0.00568	1.43323	down
A_55_P2718032	Syt1	0.0171	1.43183	down
A_52_P819156	Gm12689	0.00206	1.42583	down
A_55_P2150734	Ighv5-4	0.00366	1.41912	down
A_51_P307858	1700019N19Rik	0.048	1.41907	down
A_55_P2509998	Gm21283	0.000635	1.41589	down
A_51_P173141	2410024N13Rik	0.000256	1.40904	down
A_52_P160955	Sox11	0.00649	1.40502	down
A_51_P389834	Zpld1	0.00605	1.40274	down
A_52_P352246	Sgk1	0.00167	1.40236	down
A_52_P454765	6430548M08Rik	0.00565	1.40178	down
A_52_P900367	Gm16838	0.00983	1.40157	down
A_55_P2143688	Ntm	0.0118	1.40154	down
A_51_P282993	Spata48	0.00616	1.40008	down
A_55_P2720113	Pamr1	0.0124	1.39487	down
A_66_P137255	Or14c46	0.00161	1.39393	down
A_66_P103632	Elmo1	0.00597	1.39069	down
A_55_P2546084	Gm19733	0.0051	1.39007	down
A_55_P2719077	Me3	0.0183	1.38905	down
A_55_P2582064	Gm32498	4.54e-05	1.38632	down
A_55_P2797313	A730035I17Rik	0.0228	1.38506	down
A_51_P155909	1700113H08Rik	0.0178	1.3837	down
A_66_P111604	Gm19276	0.0379	1.37991	down
A_51_P216605	Hbp1	0.0217	1.3781	down
A_55_P2287880	A530058O07Rik	0.00176	1.37428	down
A_52_P649568	Aipl1	0.0283	1.37145	down
A_52_P732441	Marchf10	0.000163	1.37078	down
A_51_P244186	Sbf1	0.00106	1.37052	down
A_55_P2510720	Gm30732	0.0171	1.37023	down
A_52_P48569	Slc38a4	0.0335	1.36603	down
A_55_P2008860	Gm15520	0.00348	1.36502	down
A_55_P2163128	0610042G04Rik	0.00392	1.36215	down
A_55_P2181665	Gm4129	0.00267	1.35942	down
A_51_P228753	Arhgef26	0.00924	1.35771	down
A_65_P19639	Gm39922	0.00393	1.35213	down
A_55_P2178818	Itk	0.0111	1.35173	down
A_55_P1952414	Odf2	0.00825	1.35127	down
A_55_P2738723	Anxa3	0.0025	1.34976	down
A_51_P169327	Etd	0.0217	1.3495	down
A_55_P2635832	Oxsm	0.0451	1.34814	down
A_66_P107106	5430428K19Rik	0.0289	1.34677	down
A_52_P258354	Sgpp1	0.0301	1.34657	down
A_55_P2318934	1200007C13Rik	0.0133	1.34476	down
A_66_P108824	Asz1	0.00656	1.34451	down
A_51_P245796	Ddit4	0.00742	1.34353	down
A_55_P2725976	Gm16342	0.0402	1.342	down
A_55_P2726408	Usp53	0.000108	1.34034	down
A_55_P2150811	6330405D24Rik	0.0249	1.33923	down
A_55_P2181381	Pjvk	0.00999	1.33846	down
A_55_P2721523	Pard3	0.00204	1.33364	down
A_55_P2111483	Polq	0.00292	1.32856	down
A_55_P2595014	Abcc5	0.00236	1.32753	down
A_55_P2278093	AI480461	0.00442	1.32558	down
A_55_P1999862	Rad51ap2	0.0169	1.32417	down
A_52_P593110	Ptbp2	0.00495	1.32396	down
A_51_P143031	Eps8l3	0.0391	1.32024	down
A_55_P2618890	Ppp1cb	0.00348	1.31825	down
A_55_P2017570	Spaca6	0.0186	1.3181	down
A_55_P2172956	Cnih2	0.0161	1.31508	down
A_66_P103316	Gm6521	0.0374	1.31485	down
A_51_P277006	Chst8	0.0278	1.31433	down
A_55_P2253651	9330198I05Rik	0.0448	1.31284	down
A_52_P338651	Pitpnm2	0.00325	1.31119	down
A_55_P2732800	Gm5914	0.014	1.31119	down
A_52_P381657	Nbea	0.0181	1.3077	down
A_55_P2729308	Gm41313	0.0202	1.30558	down
A_55_P2535726	Gm35686	0.000169	1.30452	down
A_65_P09879	Ssbp1	0.00649	1.30349	down
A_66_P102500	Meis2	0.01	1.3034	down
A_55_P2185839	Gm7546	0.0417	1.30097	down
A_52_P238858	Shisa9	0.00537	1.29817	down
A_51_P284067	H2al3	0.0109	1.2978	down
A_55_P2114452	Scaper	0.00821	1.29618	down
A_55_P1992874	Tas2r135	0.0253	1.29175	down
A_55_P2934956	Sh3bgrl2	0.0074	1.28832	down
A_55_P1988770	Vmn2r112	0.0317	1.28669	down
A_55_P2176175	Pcdh15	0.0213	1.28209	down
A_52_P459341	Lama2	0.0226	1.28098	down
A_66_P116693	Gm35363	0.0164	1.28063	down
A_55_P1968679	Anks1b	0.0207	1.27965	down
A_55_P2720465	Ptgs1	0.0121	1.27939	down
A_52_P140049	Hepacam2	0.0237	1.27479	down
A_55_P2027263	Gm9902	0.0445	1.27437	down
A_51_P386802	1700017G19Rik	0.0344	1.27415	down
A_55_P2019670	Nps	0.000538	1.27392	down
A_51_P426353	Ucp1	0.025	1.27216	down
A_51_P242643	Skor1	0.0102	1.27198	down
A_55_P2394624	4930488N15Rik	0.0175	1.27033	down
A_51_P333896	Or2y1g	0.0086	1.26798	down
A_55_P2302888	AU042410	0.0252	1.26694	down
A_55_P1972381	Gjb4	0.00477	1.26678	down
A_52_P453374	Lrrn4cl	0.00345	1.26667	down
A_55_P2381449	A330106F07Rik	0.00533	1.26548	down
A_52_P615877	Cdc25b	0.0124	1.26416	down
A_51_P364639	Krt71	0.000211	1.26273	down
A_66_P140829	Cacng4	0.00213	1.2589	down
A_52_P102931	Gimap5	0.00145	1.25796	down
A_66_P105497	Gm5429	0.000227	1.25737	down
A_51_P154840	1700080G18Rik	0.00784	1.25713	down
A_51_P147422	Kctd19	0.00204	1.25625	down
A_52_P440265	9230110K08Rik	0.009	1.25293	down
A_66_P128530	9330117O12Rik	0.0363	1.25284	down
A_51_P173547	1700009J07Rik	0.000448	1.25211	down
A_55_P2786986	Krt14	0.00428	1.25158	down
A_51_P507333	Kcnc2	0.04	1.24875	down
A_55_P2731251	Gm6145	0.0339	1.24799	down
A_55_P2742406	Slc26a3	0.0213	1.2442	down
A_66_P134758	Gm38562	0.0383	1.24412	down
A_55_P2121038	Gm10825	0.000537	1.2429	down
A_51_P375754	Hoxc10	0.00203	1.24172	down
A_51_P137125	Mybph	0.00525	1.24169	down
A_55_P2737492	Tshz2	0.00661	1.23707	down
A_51_P186956	Adam2	0.0173	1.2353	down
A_55_P2741740	Dio3os	0.0013	1.23427	down
A_55_P2095716	Gnrh1	0.00608	1.23349	down
A_55_P2736720	Mast3	0.0362	1.2327	down
A_66_P122060	4833418N02Rik	0.00917	1.23073	down
A_55_P2174110	Trav21-dv12	0.0279	1.22892	down
A_66_P121393	Cog7	0.000617	1.22472	down
A_51_P279437	Mfsd2a	0.0234	1.22453	down
A_55_P2735215	Lpin1	0.00309	1.22402	down
A_66_P140200	Or9s13	0.0265	1.22277	down
A_55_P2056792	Cmtm2a	0.0256	1.22251	down
A_55_P2092246	Sec61a2	0.0061	1.22083	down
A_51_P196581	Or8b53	0.0442	1.21917	down
A_52_P88591	Pofut2	0.00231	1.21746	down
A_55_P2212259	4930539J05Rik	0.00748	1.21631	down
A_55_P1957932	1700086D15Rik	0.011	1.21622	down
A_66_P129209	Gm12511	0.00483	1.21321	down
A_55_P2073094	Trex2	0.00341	1.21308	down
A_55_P2722343	Camta1	0.014	1.2124	down
A_55_P2538469	Gm30591	0.0206	1.21144	down
A_52_P337948	Tnik	0.000795	1.21142	down
A_55_P2011097	Gsdma2	0.0188	1.21105	down
A_55_P2089472	1700020A23Rik	0.0343	1.20902	down
A_66_P111594	V1ra8	0.000668	1.209	down
A_55_P2508198	A930004D18Rik	0.0442	1.20856	down
A_51_P364560	D330050I16Rik	0.0176	1.20663	down
A_65_P09051	Trim12a	0.0355	1.20649	down
A_51_P203850	4930539H15Rik	0.00644	1.20423	down
A_66_P131914	Sycp1	0.0388	1.20379	down
A_55_P2842743	Gm31727	0.0264	1.19852	down
A_55_P2084177	Klhl34	0.00978	1.19834	down
A_55_P2735985	Zbtb8b	0.0262	1.19766	down
A_55_P2527639	9930012K11Rik	0.0454	1.19389	down
A_55_P2733007	Gm38414	0.000852	1.19138	down
A_52_P201992	Large2	0.0414	1.19133	down
A_55_P2086820	Zfp651	0.0448	1.18805	down
A_52_P13109	Aldh2	0.00381	1.18455	down
A_55_P2187899	4930505N22Rik	0.0124	1.18455	down
A_55_P2024150	Slco6b1	0.0453	1.17981	down
A_55_P1983921	Crybb3	0.0153	1.17811	down
A_52_P544043	Pcsk5	0.0328	1.17635	down
A_66_P100500	Gm5112	0.0103	1.17563	down
A_51_P264548	4933427E11Rik	0.0213	1.1721	down
A_55_P2328013	Aste1	0.00244	1.16833	down
A_65_P09236	Cbx4	0.00914	1.16828	down
A_55_P2151308	G430095P16Rik	0.0003	1.16564	down
A_51_P288802	Rhof	0.0401	1.16533	down
A_55_P2057435	Gm6566	0.00479	1.16379	down
A_52_P115541	Spem1	0.0429	1.16368	down
A_55_P2543111	1700031L13Rik	0.0443	1.16274	down
A_52_P1142105	Ighv4-1	0.0182	1.1627	down
A_52_P159050	Cds2	0.00749	1.16241	down
A_55_P2387515	Gvin-ps1	0.00347	1.16185	down
A_55_P2071349	Trh	0.0213	1.1611	down
A_51_P304490	Olfr12	0.0485	1.16086	down
A_51_P305061	0610039K10Rik	0.0251	1.16012	down
A_52_P618947	Olfr1487	0.0144	1.15977	down
A_55_P2578173	Gm35282	0.0368	1.15817	down
A_55_P2157236	9330160F10Rik	0.021	1.15735	down
A_55_P2602690	Kcnn2	0.0116	1.15471	down
A_66_P106997	Gm3404	0.0406	1.15466	down
A_66_P123254	Dipk2b	0.0245	1.15435	down
A_55_P2052360	Or2y12	0.0375	1.1524	down
A_51_P376501	Stard9	0.0147	1.15224	down
A_52_P168319	Mia2	0.0286	1.15198	down
A_66_P111336	Gm10782	0.00791	1.1508	down
A_66_P124810	A230020J21Rik	0.0362	1.14851	down
A_55_P2009320	Gm12258	0.00365	1.14843	down
A_55_P2314316	Hnf4aos	0.0389	1.14732	down
A_55_P2935012	Gabrg1	0.00576	1.14593	down
A_55_P2826264	Gm29926	0.0028	1.14588	down
A_55_P2108988	Kcnip3	0.0153	1.14575	down
A_55_P2714742	Nf1	0.00803	1.14494	down
A_55_P2733695	Zfp933	0.000476	1.14481	down
A_55_P2164492	Samhd1	0.011	1.14427	down
A_55_P2736190	Tbc1d2b	0.00483	1.14342	down
A_66_P112091	Efcab8	0.0482	1.14222	down
A_66_P101251	Chmp3	0.00742	1.14219	down
A_52_P150588	Snrpd3	0.00455	1.14166	down
A_55_P1982971	Otol1	0.0438	1.14022	down
A_55_P2129696	Smad9	0.00767	1.13987	down
A_55_P2622700	Slc43a3	0.00953	1.13875	down
A_55_P1962680	Gm21719	0.0143	1.13846	down
A_51_P353814	Crygn	0.013	1.1355	down
A_55_P1970436	Slc23a4	0.0084	1.13411	down
A_65_P13316	Fam20b	0.0353	1.13392	down
A_55_P2715725	Mcf2l	0.0494	1.13346	down
A_55_P2377693	2310068J16Rik	0.00433	1.13194	down
A_51_P519497	Eqtn	0.0343	1.12982	down
A_52_P322421	Mpzl2	0.00764	1.12691	down
A_52_P374947	Magea3	0.00969	1.12612	down
A_55_P2146646	Frg2f11	0.0126	1.12524	down
A_55_P2016421	Nova1	0.00433	1.12481	down
A_55_P2926661	Adhfe1	0.0493	1.12259	down
A_55_P2727434	Zkscan14	0.00912	1.12238	down
A_51_P463428	Pik3ip1	0.0362	1.12128	down
A_55_P2506450	Cirbp	0.0112	1.12108	down
A_51_P183041	Efcc1	0.0221	1.11917	down
A_52_P91274	1700018G05Rik	0.044	1.11897	down
A_55_P2309020	1810007D17Rik	0.00701	1.11858	down
A_52_P493322	Zfp866	0.00102	1.11766	down
A_55_P2926200	Cxxc4	0.00347	1.11639	down
A_66_P104945	Krt24	0.0291	1.11405	down
A_55_P2733727	Antkmt	0.00591	1.11379	down
A_52_P327588	Plcd4	0.0271	1.11163	down
A_51_P137184	Fam209	0.0222	1.1111	down
A_55_P2162259	Garre1	0.00316	1.10949	down
A_52_P185343	Gna13	0.00499	1.10852	down
A_55_P2733332	E030003E18Rik	0.00219	1.10786	down
A_66_P126972	Dock9	0.0155	1.10774	down
A_66_P102708	Myh15	0.00149	1.10716	down
A_52_P13680	C920021L13Rik	0.003	1.10609	down
A_55_P2744619	Six4	0.0252	1.10446	down
A_66_P138136	Scml1	0.0213	1.10398	down
A_51_P481494	Robo3	0.023	1.10363	down
A_55_P1954990	Trpv1	0.00136	1.10337	down
A_55_P2716321	Gm38503	0.0276	1.10336	down
A_55_P2005525	Krtap12-1	0.0404	1.10325	down
A_66_P122345	Defb33	0.00059	1.10325	down
A_55_P2064976	4930528A17Rik	0.00434	1.10266	down
A_55_P2814915	Epb41	0.0355	1.1018	down
A_55_P2057979	Cfap206	0.036	1.1017	down
A_55_P2362391	E130112N10Rik	0.00705	1.10137	down
A_55_P2840596	Gm15222	0.0113	1.09925	down
A_55_P2043227	Magea1	0.0337	1.09833	down
A_52_P350786	Phlda2	0.0093	1.0977	down
A_55_P2728976	Sh2d4b	0.00386	1.09472	down
A_52_P183071	Rnf146	0.00515	1.09403	down
A_55_P2019577	1500011B03Rik	0.0139	1.09363	down
A_66_P102903	Fez1	0.0426	1.09342	down
A_55_P2756229	Or8b50	0.0237	1.09261	down
A_66_P122621	Gm9889	0.0135	1.09156	down
A_66_P101933	Urah	0.02	1.08915	down
A_66_P111137	Pde8b	0.00356	1.08875	down
A_55_P2822812	Gm26838	0.0281	1.08764	down
A_52_P265578	Vmo1	0.00112	1.087	down
A_52_P181408	Dpp10	0.0295	1.08517	down
A_55_P2930389	Slc6a2	0.0416	1.08464	down
A_55_P2529154	Lhcgr	0.0368	1.08462	down
A_66_P134560	Slco2a1	0.000256	1.08399	down
A_66_P123851	Zp2	0.000585	1.08339	down
A_55_P2750948	1700110I07Rik	0.00839	1.08328	down
A_66_P135672	F730035M05Rik	0.0266	1.08286	down
A_66_P114895	Gm34746	0.0116	1.08189	down
A_55_P2510472	Gm15133	0.0185	1.08147	down
A_55_P2136145	Cnn3	0.00467	1.0804	down
A_55_P2716012	Efr3a	0.000618	1.08037	down
A_55_P2098925	Wfdc5	0.00826	1.08031	down
A_51_P293812	Ccdc88c	0.0144	1.07955	down
A_55_P1982325	Ndst4	0.00542	1.07918	down
A_55_P2013326	Muc21	0.00496	1.07603	down
A_55_P2033100	Or4c110	0.0293	1.07468	down
A_55_P1956737	Hsf2bp	0.0199	1.0746	down
A_52_P679105	Prss23	0.0173	1.0725	down
A_55_P2162229	LOC432842	0.0468	1.07128	down
A_51_P383014	Arhgap26	0.00106	1.07093	down
A_66_P127039	Olfr954	0.00951	1.07002	down
A_55_P2831611	Prmt8	0.0114	1.06943	down
A_55_P2510137	2010010A06Rik	0.0276	1.06934	down
A_55_P2168256	Top3a	0.0132	1.06911	down
A_55_P2756259	Or13a1	0.00581	1.06806	down
A_66_P133573	Gm33926	0.00205	1.068	down
A_52_P646957	Grpr	0.00955	1.06699	down
A_51_P276305	Stra8	0.00906	1.06368	down
A_55_P2082376	Crybb2	0.0219	1.06282	down
A_66_P126255	Or2t47	0.0481	1.06164	down
A_51_P324450	Pbp2	0.00464	1.06149	down
A_55_P2719749	Kif24	0.024	1.0609	down
A_66_P137451	Gm33786	0.00443	1.0609	down
A_55_P2924275	Rhobtb2	0.0428	1.06086	down
A_51_P431347	Prl3a1	0.0165	1.06008	down
A_65_P04635	Ypel1	0.0108	1.0595	down
A_52_P24753	B930025P03Rik	0.00538	1.05906	down
A_66_P108337	D630013N20Rik	0.00181	1.05815	down
A_66_P108143	Fbxw10	0.0178	1.05766	down
A_66_P102869	B230340J04Rik	0.0155	1.05583	down
A_55_P2111444	Trpv6	0.00511	1.05491	down
A_55_P2851756	Teddm2	0.0266	1.05438	down
A_55_P2057528	Arl4d	0.0296	1.05438	down
A_66_P132444	Cx3cl1	0.00768	1.05281	down
A_55_P2288983	Ceacam2	0.047	1.0528	down
A_55_P2398788	Rnf112	0.049	1.05217	down
A_52_P469956	Zc3h6	0.00758	1.05068	down
A_55_P2118081	Gm12171	0.0292	1.05057	down
A_55_P2109218	Csmd3	0.00752	1.05033	down
A_55_P1985342	Scgb2a2	0.00528	1.05027	down
A_51_P497039	Mpp3	0.013	1.05019	down
A_66_P138777	1700061J23Rik	0.00376	1.04823	down
A_55_P2728753	Anxa10	0.0308	1.04751	down
A_52_P292498	Rapgef4	0.033	1.04653	down
A_55_P1965584	Eif4e	0.00741	1.04554	down
A_55_P2030373	Atp1a2	0.0306	1.04522	down
A_52_P28960	Gdf6	0.0113	1.0448	down
A_51_P284716	4930407I10Rik	0.0125	1.04432	down
A_51_P497090	Enho	0.0134	1.04418	down
A_55_P2729348	Dnah9	0.018	1.04393	down
A_52_P220176	Dkk3	0.0297	1.04376	down
A_52_P63905	Ddc	0.00888	1.04304	down
A_51_P474053	Erv3	0.0154	1.04286	down
A_55_P2216531	2610209C05Rik	0.0117	1.04266	down
A_55_P2585110	Rab11fip2	0.00118	1.04204	down
A_51_P402617	Nkx6-2	0.000677	1.04099	down
A_66_P101427	2310026L22Rik	0.0143	1.04071	down
A_55_P2096071	Nanos2	0.00177	1.04039	down
A_55_P2274378	Tbx3os1	0.00046	1.04009	down
A_55_P2740980	Srrm3	0.0222	1.03956	down
A_55_P2737174	Ccdc136	0.0309	1.03853	down
A_66_P104184	Gm33104	0.00333	1.03829	down
A_52_P368306	Tmem100	0.032	1.03812	down
A_55_P2032355	4933423P22Rik	0.0316	1.03752	down
A_52_P1138659	Fmo2	0.014	1.03688	down
A_55_P2731151	B3galnt2	0.00048	1.03653	down
A_55_P1959081	Cdkl5	0.00252	1.03403	down
A_66_P111411	Hoxc8	0.0318	1.0337	down
A_66_P109802	Ces3b	0.0277	1.03306	down
A_51_P133562	Serpina6	0.043	1.03226	down
A_55_P2578561	Gm34726	0.026	1.03167	down
A_51_P278230	Hinfp	0.00231	1.03086	down
A_51_P228574	Tat	0.0241	1.03021	down
A_51_P198694	Gckr	0.0397	1.02865	down
A_55_P2550183	Gm31872	0.00681	1.02809	down
A_66_P121519	Gm1971	0.00307	1.02788	down
A_55_P2726051	Gm38508	0.00716	1.02776	down
A_66_P126314	Zfp64	0.00169	1.02487	down
A_55_P2737892	Pxdn	0.00092	1.02313	down
A_55_P2296320	Gm13112	0.0373	1.02176	down
A_66_P119534	Zbtb16	0.0377	1.02046	down
A_66_P116348	Sh2d6	0.0117	1.01954	down
A_66_P137326	D730045A05Rik	0.00391	1.01896	down
A_66_P135651	Capn9	0.0415	1.01842	down
A_55_P2937163	Gm33228	0.024	1.01742	down
A_52_P203560	Fzd10	0.0231	1.0173	down
A_55_P2057523	Ppm1b	0.00899	1.01574	down
A_55_P2745095	Trpc3	0.0202	1.01451	down
A_55_P2865097	4930564I24Rik	0.0131	1.01422	down
A_66_P108793	Gm7628	0.0125	1.01328	down
A_55_P2027386	Gpr156	0.0256	1.01296	down
A_51_P275365	Or9s15	0.0267	1.01232	down
A_52_P189449	Eif4enif1	0.00563	1.01147	down
A_52_P444946	Rprml	0.0154	1.01098	down
A_51_P367298	Septin8	0.000543	1.01066	down
A_55_P2509914	Gm6300	0.00552	1.00986	down
A_52_P54629	Hacd1	0.0443	1.0098	down
A_51_P296352	Cacna1f	0.0286	1.00951	down
A_65_P08465	Tlk2	0.00546	1.00849	down
A_51_P246060	Dazl	0.00467	1.00797	down
A_66_P135224	Gm41724	0.00485	1.00714	down
A_55_P1977454	4930570G19Rik	0.0143	1.00597	down
A_55_P2733965	Csf2rb	0.0075	1.00573	down
A_55_P2022175	Sly	0.0459	1.0044	down
A_66_P103727	Pnrc1	0.0136	1.00325	down
A_52_P67643	Mtor	0.00716	1.00179	down
A_51_P204387	Tmem63c	0.00599	1.00132	down
A_55_P2182056	Zfp352	0.00409	1.00076	down
A_55_P2793729	Klf15	0.0251	1.0004	down
A_55_P2019909	Tmem35b	0.00543	-1.00144	up
A_55_P2509383	C130046K22Rik	0.0285	-1.00164	up
A_55_P2717732	Riox2	0.0209	-1.00209	up
A_55_P2917658	Evi2	0.0118	-1.00234	up
A_55_P2343648	1700120C14Rik	0.00413	-1.00275	up
A_55_P1984035	Litaf	0.00543	-1.00327	up
A_52_P250034	Ticrr	0.000417	-1.00443	up
A_55_P2163837	Med14	0.019	-1.0059	up
A_51_P465582	Hdhd3	0.0286	-1.00593	up
A_55_P2718269	Xiap	0.00682	-1.00607	up
A_55_P1990032	Cxcl5	0.0451	-1.00712	up
A_55_P2513500	Kansl3	0.0112	-1.00937	up
A_51_P352232	Ppt1	0.0457	-1.00984	up
A_55_P2070431	Coro7	0.00597	-1.01225	up
A_55_P1998943	Oas1a	0.0043	-1.01291	up
A_52_P159336	Lrba	0.0321	-1.0143	up
A_55_P2053181	Nefh	0.0203	-1.01568	up
A_52_P481316	Wdr93	0.00541	-1.01626	up
A_51_P385099	Tnf	0.011	-1.01628	up
A_51_P230537	Odad1	0.00802	-1.01658	up
A_66_P129846	Gm34517	0.0286	-1.01681	up
A_66_P122805	Cap2	0.000814	-1.01695	up
A_55_P2486439	Ube2cbp	0.00321	-1.01762	up
A_52_P572188	Atp1a3	0.00929	-1.02023	up
A_55_P2727444	2310047D07Rik	0.000235	-1.02137	up
A_51_P210591	Fcer2a	0.0329	-1.02164	up
A_52_P111639	Xndc1	0.00426	-1.02173	up
A_66_P121137	Idi2	0.0254	-1.02227	up
A_55_P2908267	Srsf6	0.0164	-1.02268	up
A_51_P419078	Mdn1	0.00851	-1.0231	up
A_55_P2079571	Gm10555	0.00338	-1.02413	up
A_51_P160536	Cfap161	0.00142	-1.02537	up
A_52_P390913	Ccdc96	0.000169	-1.02554	up
A_52_P100926	Il1a	0.00521	-1.0257	up
A_51_P228768	Slfn3	0.00102	-1.02625	up
A_55_P2736210	Ccdc159	0.00111	-1.02642	up
A_55_P2154724	Mettl4	0.0106	-1.02757	up
A_52_P113043	Kctd4	0.00107	-1.02845	up
A_55_P2086279	Gm7609	0.00678	-1.03023	up
A_55_P2041868	Ptafr	0.0134	-1.03052	up
A_51_P166288	Acy1	0.0131	-1.03075	up
A_66_P103311	Il22ra1	0.00204	-1.03232	up
A_52_P669005	Lrat	0.00553	-1.03267	up
A_51_P446856	Flnb	0.00341	-1.03448	up
A_66_P116441	Ms4a6d	0.00805	-1.03653	up
A_52_P648105	Klhdc4	0.0145	-1.03659	up
A_51_P374726	Ptx3	0.0138	-1.03725	up
A_52_P476795	Rhpn1	0.0157	-1.03735	up
A_51_P197116	Rnase2b	0.0232	-1.03804	up
A_51_P196997	Soat2	0.023	-1.03944	up
A_55_P1960411	Lrrc23	0.00344	-1.03952	up
A_51_P171382	Scart1	0.0392	-1.03978	up
A_52_P670275	Kif14	0.000573	-1.0398	up
A_52_P381799	Neto2	0.0233	-1.04046	up
A_52_P533930	Angptl2	0.0455	-1.04058	up
A_52_P572476	Dhrs9	0.0118	-1.04101	up
A_55_P2728887	Nup210l	0.033	-1.04137	up
A_51_P305230	Elavl3	0.0309	-1.04266	up
A_55_P2130497	Ighv1-67	0.0105	-1.04301	up
A_55_P2174621	Gm4311	0.0334	-1.04323	up
A_66_P116173	Il23r	0.0337	-1.04372	up
A_66_P122876	E430002N23Rik	0.0421	-1.04385	up
A_55_P2046938	Adpgk	0.0465	-1.04391	up
A_51_P328659	Or5al5	0.0388	-1.0441	up
A_51_P140710	Ccl3	0.00157	-1.04472	up
A_66_P100391	Gm26911	0.0168	-1.04578	up
A_51_P230098	Pbk	0.00353	-1.04604	up
A_51_P201785	Morn5	0.0203	-1.04636	up
A_55_P2739288	Ctc1	0.00146	-1.04715	up
A_66_P102792	Tiam2	0.00657	-1.04811	up
A_66_P102636	Gm17746	0.00244	-1.04887	up
A_52_P820196	Cxcl15	0.0258	-1.05097	up
A_51_P146655	Ptgr2	0.0121	-1.05113	up
A_52_P226348	F730043M19Rik	0.00835	-1.05403	up
A_55_P2054897	Rnd1	0.016	-1.0548	up
A_55_P2737772	Zc3h12a	0.0149	-1.05531	up
A_52_P378959	Tmem232	0.0367	-1.0561	up
A_51_P143659	Epo	0.0238	-1.05615	up
A_66_P103493	AA387883	0.0257	-1.05691	up
A_55_P2048460	Fam166b	0.00827	-1.05698	up
A_51_P518014	Slc36a3	0.00559	-1.05819	up
A_55_P2005956	Egfbp2	0.0178	-1.05858	up
A_55_P2733467	Pdgfb	0.0112	-1.0586	up
A_55_P2509988	Gm12596	0.0249	-1.05901	up
A_52_P149451	Tdp1	0.00631	-1.06194	up
A_55_P2916007	Tmem200c	0.00072	-1.06314	up
A_51_P235440	Pelp1	0.00966	-1.06331	up
A_55_P2668458	Ccdc24	0.00414	-1.06356	up
A_55_P2516699	Ggh	0.0374	-1.06372	up
A_52_P980532	Gm29684	0.00958	-1.06536	up
A_51_P285047	Cd160	0.00914	-1.06579	up
A_66_P122290	Mettl8	0.0327	-1.06602	up
A_51_P122055	Vwa7	0.00523	-1.06668	up
A_55_P1960237	Slc2a6	0.0263	-1.06675	up
A_52_P492989	Ncan	0.0103	-1.06679	up
A_51_P348792	Opn5	0.00396	-1.06694	up
A_66_P121150	Gm30082	0.0151	-1.06725	up
A_55_P2002773	1810053B23Rik	0.00656	-1.06833	up
A_51_P120448	Echdc1	0.00982	-1.0696	up
A_55_P2000409	Rab44	0.0124	-1.07011	up
A_55_P2029892	Cfap46	0.00607	-1.07147	up
A_66_P108230	Gm1600	0.00288	-1.07259	up
A_52_P7154	Wdr5	0.0216	-1.07368	up
A_51_P398376	Clec5a	0.0076	-1.07415	up
A_55_P2039230	Ifi213	7.18e-05	-1.07602	up
A_52_P18841	Caps2	0.00241	-1.07613	up
A_52_P355057	Wdr4	0.0183	-1.07829	up
A_55_P2106489	Ankrd52	0.0236	-1.07857	up
A_51_P376138	Acsm1	0.00803	-1.07896	up
A_51_P220466	Gm36371	0.034	-1.07898	up
A_55_P2099114	Eef1akmt3	0.00986	-1.07927	up
A_55_P1960396	Lrrc43	0.000712	-1.07927	up
A_55_P2005859	Fn3k	0.0116	-1.0797	up
A_51_P309084	Zmynd12	0.0127	-1.08066	up
A_55_P2789059	1700096J18Rik	0.0126	-1.08164	up
A_55_P2935046	Timm9	0.00923	-1.08189	up
A_52_P398432	Nudt5	0.0223	-1.08195	up
A_51_P248387	Pcyox1l	0.029	-1.08396	up
A_66_P140712	Gm10445	0.00186	-1.08631	up
A_55_P1969901	Ighv1-80	0.00995	-1.08897	up
A_52_P243391	Sema4f	0.00528	-1.08964	up
A_55_P2120946	Mefv	0.00871	-1.08984	up
A_52_P528963	Eps15l1	0.0182	-1.09084	up
A_51_P280666	Bend6	0.0434	-1.09183	up
A_52_P468007	Abcb7	0.0148	-1.09276	up
A_52_P143671	Arhgef39	0.00381	-1.09392	up
A_51_P310896	Pfkl	0.0327	-1.09555	up
A_55_P2092993	Radx	0.00863	-1.0966	up
A_55_P2180849	AA684185	0.0341	-1.09704	up
A_51_P308298	Myl9	0.00571	-1.09956	up
A_55_P2076941	Lrr1	0.0183	-1.10149	up
A_55_P2734872	AU015791	0.0349	-1.1016	up
A_52_P62727	B230319C09Rik	0.0436	-1.10198	up
A_51_P251717	Hikeshi	0.00731	-1.10233	up
A_55_P1984128	Cfap61	0.0134	-1.10281	up
A_52_P107947	B230369F24Rik	0.00845	-1.10456	up
A_52_P56397	Aunip	0.00279	-1.10465	up
A_52_P134195	Ceacam10	0.0117	-1.10669	up
A_66_P108009	Gm30873	0.0186	-1.10722	up
A_52_P188042	Trat1	0.0346	-1.10724	up
A_55_P2055127	Slc7a14	0.0442	-1.10892	up
A_52_P513096	9530052C20Rik	0.0102	-1.10896	up
A_66_P122905	Ly6h	0.0211	-1.10912	up
A_66_P113646	Gm13546	0.0458	-1.1107	up
A_52_P319137	Lrrc51	0.00663	-1.11073	up
A_52_P445239	Plp1	0.0305	-1.11076	up
A_55_P2174950	Gm34542	0.00888	-1.11093	up
A_55_P2911825	Aldh18a1	0.0237	-1.11105	up
A_52_P227391	Kif15	0.000138	-1.11156	up
A_66_P118209	Slc39a12	0.00706	-1.11342	up
A_55_P2009767	Mapkapk3	0.0334	-1.11435	up
A_66_P110906	3110083C13Rik	0.00247	-1.1179	up
A_55_P2114342	Mirt2	0.00245	-1.1194	up
A_66_P115693	Rnf207	0.0167	-1.11947	up
A_52_P651371	Alg8	0.0032	-1.12045	up
A_55_P2501254	Awat2	0.0177	-1.12484	up
A_55_P2081780	Asb7	0.0304	-1.12571	up
A_55_P2733132	Cacna2d1	0.00424	-1.12593	up
A_55_P2001871	Uros	0.00316	-1.12594	up
A_51_P501998	Asb18	0.0273	-1.12852	up
A_51_P430766	Il10	0.0363	-1.12884	up
A_51_P261412	T2	0.00187	-1.12893	up
A_52_P8197	Slc17a6	0.0123	-1.12942	up
A_65_P06649	Rrp12	0.0178	-1.13001	up
A_55_P2589872	D330045A20Rik	0.00329	-1.13039	up
A_55_P2719474	Pdlim4	0.0165	-1.13096	up
A_52_P148289	D030028A08Rik	0.0105	-1.13238	up
A_66_P131023	Htr3a	0.00594	-1.13795	up
A_55_P2010152	Sell	0.00382	-1.13863	up
A_55_P2745905	Mthfd2	0.0129	-1.13887	up
A_52_P287328	Armc6	0.0253	-1.14045	up
A_55_P2743987	Gm9342	0.0332	-1.14172	up
A_52_P537907	Tsga10	0.00927	-1.14381	up
A_55_P2099605	Ect2	0.027	-1.14425	up
A_51_P385718	Cd177	0.0118	-1.14573	up
A_51_P320137	Zxdc	0.0226	-1.14604	up
A_52_P1091449	1500032F14Rik	0.0066	-1.1464	up
A_55_P2739032	F13a1	0.0168	-1.14694	up
A_55_P2771227	Gm31115	0.0141	-1.14779	up
A_66_P126420	Gm20655	0.00271	-1.14958	up
A_66_P101566	Odad2	0.000987	-1.14972	up
A_55_P2742690	Cd226	0.0251	-1.15082	up
A_52_P484838	Rfxank	0.00602	-1.15432	up
A_51_P259983	4930425F17Rik	0.00102	-1.15515	up
A_55_P2174323	Pgpep1l	0.00705	-1.15539	up
A_51_P389885	Spic	0.0393	-1.15573	up
A_66_P113866	C330026H20Rik	0.000481	-1.1558	up
A_52_P110534	Ttk	0.00461	-1.15745	up
A_52_P562624	Pkhd1l1	0.0051	-1.15792	up
A_52_P601903	6030458C11Rik	0.0448	-1.1605	up
A_55_P2728227	Lpcat2	0.0103	-1.16084	up
A_55_P2735250	BC055324	0.00385	-1.16129	up
A_55_P2797285	Lrriq3	0.0014	-1.16217	up
A_66_P135865	6330537M06Rik	0.0182	-1.16283	up
A_55_P1987926	Vmn1r122	0.00301	-1.16369	up
A_55_P2158011	Knstrn	0.00561	-1.16446	up
A_52_P556462	Fancd2	0.00886	-1.16613	up
A_55_P2542858	Gm30601	0.00011	-1.16831	up
A_55_P2720670	Lamc2	0.00101	-1.17187	up
A_55_P2935131	9330158H04Rik	0.000285	-1.17225	up
A_52_P980161	Gm5127	0.00799	-1.17318	up
A_52_P109430	Gapt	0.0113	-1.17452	up
A_52_P651998	Minpp1	0.00628	-1.17514	up
A_52_P622784	2900041H08Rik	0.0067	-1.17514	up
A_51_P256337	Mbd2	0.00971	-1.1753	up
A_51_P100625	Apon	0.00392	-1.17555	up
A_52_P537827	Wdr72	0.0267	-1.17762	up
A_51_P131888	Capns2	0.0255	-1.17809	up
A_52_P668442	Megf11	0.0291	-1.17866	up
A_55_P2132832	Vmn1r178	0.0432	-1.18128	up
A_55_P2216561	2500002B13Rik	0.0222	-1.18347	up
A_55_P2167530	Scube3	0.000276	-1.18436	up
A_55_P2742545	Gm16120	0.0373	-1.18455	up
A_66_P109215	Dlec1	0.0126	-1.18504	up
A_55_P2908509	Sod2	0.00604	-1.18747	up
A_51_P142767	Glt8d2	0.0116	-1.18865	up
A_66_P138170	Mthfsd	0.00214	-1.19002	up
A_52_P235995	Nwd2	0.0388	-1.19084	up
A_55_P2811679	Cxcl1	0.0453	-1.19165	up
A_55_P2730486	B4galnt1	0.0183	-1.1925	up
A_65_P09523	Scrn3	0.0139	-1.19269	up
A_55_P2648840	Adam32	0.000235	-1.19353	up
A_52_P258617	Cd180	0.0147	-1.19408	up
A_55_P2140963	Emx1	0.000641	-1.19416	up
A_55_P2788789	Gm15848	0.0103	-1.19436	up
A_66_P139683	Zbp1	5e-05	-1.19436	up
A_51_P241995	Col5a3	0.00109	-1.19437	up
A_52_P510592	Adamts2	0.000149	-1.19468	up
A_55_P2061834	Cdh24	8.8e-05	-1.19476	up
A_55_P1965757	Eme2	0.0146	-1.19839	up
A_55_P2517877	Cfap69	0.029	-1.19847	up
A_65_P17813	Gpc6	0.00389	-1.20001	up
A_55_P2136776	Sult1b1	0.0488	-1.20016	up
A_55_P2596047	Fignl1	0.00454	-1.20178	up
A_51_P281273	Or2ag19	0.0126	-1.20271	up
A_52_P513477	Dzip3	0.0127	-1.2034	up
A_55_P2106926	Kcna3	0.0396	-1.20345	up
A_51_P286737	Ccl2	0.000282	-1.20364	up
A_66_P135331	Ermard	0.0103	-1.20417	up
A_52_P645632	Senp8	0.000211	-1.20585	up
A_52_P153929	Brip1	0.000772	-1.20605	up
A_55_P2057311	Sox5it	9.48e-05	-1.20734	up
A_52_P260241	Atcayos	0.0424	-1.20747	up
A_51_P416669	Krt1	0.00411	-1.2078	up
A_51_P520139	Pierce2	0.00182	-1.21004	up
A_55_P2721747	C1qc	0.0492	-1.21174	up
A_55_P2039699	Camp	0.00938	-1.21527	up
A_51_P363218	Dhx58	0.00323	-1.21578	up
A_55_P2732171	Slc6a1	0.0305	-1.21618	up
A_55_P1957125	Vmn2r46	0.0242	-1.21821	up
A_55_P2903297	H19	0.0041	-1.22041	up
A_55_P2488574	Samd12	0.0197	-1.22347	up
A_51_P480073	Chad	0.0374	-1.22414	up
A_66_P109065	Cald1	0.0163	-1.22421	up
A_55_P2232754	Smarcal1	0.00763	-1.2243	up
A_55_P2735420	Gm16046	0.00185	-1.22522	up
A_51_P150653	Ptprv	0.0161	-1.22557	up
A_51_P464838	Il17rb	0.00968	-1.22609	up
A_51_P288558	Cfap52	0.00526	-1.22693	up
A_55_P2075067	Gm5862	0.00973	-1.22779	up
A_51_P344499	Zfp748	0.0113	-1.22949	up
A_55_P2018651	Cfap74	0.0409	-1.23088	up
A_65_P15877	Lrrc45	0.00444	-1.232	up
A_52_P290021	Memo1	0.0126	-1.23281	up
A_51_P346815	Arxes1	0.0142	-1.23323	up
A_52_P232813	Cxcl3	0.00175	-1.23361	up
A_55_P2713321	Top3b	0.0166	-1.23563	up
A_52_P399584	Ckap2l	0.0012	-1.23804	up
A_55_P2714080	Gm10874	0.0105	-1.23952	up
A_52_P150273	2610027K06Rik	0.00588	-1.2411	up
A_51_P503822	Slitrk6	0.0454	-1.24365	up
A_55_P1962400	Il1rn	0.0138	-1.24478	up
A_55_P1963495	4933404G15Rik	0.0161	-1.24766	up
A_66_P137545	Gm34078	0.000215	-1.24841	up
A_55_P2503485	Zyx	0.0161	-1.25049	up
A_55_P2142733	Drc3	0.0462	-1.25137	up
A_55_P2116385	Gpr183	0.0119	-1.25148	up
A_55_P1975215	Npas4	0.0142	-1.25477	up
A_55_P1970454	Usp35	0.0471	-1.26043	up
A_55_P2305010	A730089K16Rik	0.0385	-1.26068	up
A_51_P360077	Tspan9	0.0138	-1.26317	up
A_55_P2165369	Pgghg	0.0261	-1.2653	up
A_55_P2141311	AU022252	0.0165	-1.26696	up
A_51_P308912	Mybphl	0.0489	-1.26783	up
A_52_P723294	Cenpp	0.00599	-1.26828	up
A_51_P463628	Vis1	0.00296	-1.26916	up
A_52_P151240	Alkal1	0.00255	-1.27606	up
A_55_P2163729	Tvp23a	0.0145	-1.27676	up
A_66_P121007	Gm8016	0.00602	-1.27784	up
A_66_P132015	E2f8	0.00112	-1.27848	up
A_55_P2204227	B530045E10Rik	0.042	-1.27966	up
A_55_P2741899	Gja1	0.0145	-1.28119	up
A_51_P157976	Mmab	0.0133	-1.28142	up
A_55_P2095754	Mrgpra5	0.00203	-1.28248	up
A_55_P2584233	Gm36542	0.0254	-1.28399	up
A_52_P64707	Foxa3	0.0476	-1.2901	up
A_55_P2120219	Rad51b	0.0483	-1.2927	up
A_55_P2051721	Psg22	0.00163	-1.29487	up
A_66_P123617	Lmod1	0.000428	-1.29565	up
A_52_P26626	Cibar2	0.00849	-1.29752	up
A_51_P436652	Ccl7	0.000257	-1.29859	up
A_55_P2030996	9830107B12Rik	0.00123	-1.30082	up
A_51_P455326	Sele	0.00189	-1.30271	up
A_55_P2100025	Zscan22	3.95e-05	-1.30272	up
A_55_P1988689	Rbpjl	0.0106	-1.30518	up
A_55_P2019349	Txnrd2	0.0355	-1.30587	up
A_55_P1977498	Htr2b	0.00311	-1.30609	up
A_51_P208801	Ndufab1	0.00976	-1.30831	up
A_66_P118466	Gm16701	0.00018	-1.31143	up
A_55_P2142575	Tdrd5	0.0228	-1.31369	up
A_66_P109941	Mamdc4	0.0148	-1.31419	up
A_52_P207173	Serpine1	0.0391	-1.31452	up
A_66_P118472	Rbfaos	0.0145	-1.31562	up
A_51_P183812	Slfn4	0.000541	-1.31792	up
A_52_P478159	P2rx6	0.016	-1.31813	up
A_52_P337126	Bves	0.0186	-1.31834	up
A_52_P674348	9130230L23Rik	0.00377	-1.31874	up
A_55_P2160456	Defb40	0.000195	-1.31918	up
A_55_P2812442	Dlgap1	0.00128	-1.31934	up
A_55_P2068312	Gm17019	0.0355	-1.32001	up
A_55_P2142251	H3c15	0.00444	-1.32064	up
A_55_P2713985	Plxna3	0.00221	-1.32143	up
A_55_P2101541	Vmn2r7	0.0226	-1.32505	up
A_66_P138825	Rsph14	3.49e-05	-1.32854	up
A_66_P138053	Gm9917	0.0289	-1.3313	up
A_55_P2788641	Gm36418	0.013	-1.33136	up
A_55_P2542833	Gm30178	0.000405	-1.3316	up
A_66_P139646	Pla2g4c	0.000727	-1.33249	up
A_55_P2369961	4930502C15Rik	0.00235	-1.33414	up
A_55_P1997421	Csta3	0.0355	-1.33537	up
A_51_P391566	BC002189	0.0132	-1.33579	up
A_66_P114500	Il1b	0.0326	-1.33772	up
A_52_P432904	Ddx11	0.0102	-1.33872	up
A_55_P2137314	Kctd21	0.0145	-1.33899	up
A_55_P2742920	Myo5c	0.00347	-1.34014	up
A_52_P596595	Pnma2	0.0115	-1.34182	up
A_55_P2167833	4930431F10Rik	0.0164	-1.34184	up
A_66_P105132	Oas1g	0.000963	-1.34225	up
A_55_P2736055	Kif1a	0.00924	-1.34362	up
A_55_P2127587	Smcr8	0.00249	-1.34482	up
A_55_P2172001	Mrgpra2a	0.00273	-1.35187	up
A_51_P308796	Fosl1	0.0238	-1.35305	up
A_51_P289429	Spef2	0.00442	-1.35337	up
A_51_P123625	Acod1	0.0269	-1.35359	up
A_52_P144818	Ppp1r1a	0.0294	-1.35513	up
A_52_P278047	Padi4	0.00193	-1.3556	up
A_52_P18116	Ccl24	0.000405	-1.35627	up
A_55_P2004652	Klrc1	0.000328	-1.35789	up
A_52_P908143	Gm26878	0.0175	-1.35814	up
A_55_P2041140	Gm9758	0.00824	-1.35908	up
A_55_P2719040	B3gnt7	0.0024	-1.36075	up
A_52_P18922	Chid1	5.72e-05	-1.3633	up
A_51_P510663	Supt3	0.00336	-1.36377	up
A_66_P123835	Gm5427	4.68e-05	-1.36437	up
A_52_P452689	Atf3	0.00927	-1.36588	up
A_55_P2518605	Kntc1	0.000432	-1.36609	up
A_52_P116973	Zfp663	0.000483	-1.3684	up
A_55_P2016792	Inpp4b	0.00223	-1.37023	up
A_55_P2019557	Mrgpra2b	0.00102	-1.37172	up
A_52_P316817	Ift80	0.00469	-1.37747	up
A_52_P33927	Utp6	0.0389	-1.37761	up
A_51_P336599	Kcne3	0.00731	-1.37777	up
A_52_P293482	Lgals12	1.7e-05	-1.37899	up
A_66_P127787	Sptlc2	0.0191	-1.37938	up
A_51_P154083	Mettl3	0.0044	-1.38068	up
A_52_P578732	Ccr5	0.00539	-1.38231	up
A_52_P234127	Tenm3	0.0135	-1.38265	up
A_55_P2489204	Ccdc146	0.00271	-1.38334	up
A_52_P263490	Rubcn	0.000485	-1.38706	up
A_55_P2728272	Gnb1l	0.0121	-1.38725	up
A_51_P187262	Mmp25	0.0129	-1.38735	up
A_51_P217697	Cfap157	0.0112	-1.38753	up
A_55_P2813788	Adam4	0.0071	-1.38762	up
A_51_P419007	Hspb3	0.0226	-1.3896	up
A_55_P2717199	Prdm10	0.00922	-1.39299	up
A_55_P2031836	Gpr85	0.00176	-1.39372	up
A_51_P196718	Adcy1	0.0193	-1.39816	up
A_51_P503896	Pycr1	0.00904	-1.39818	up
A_51_P453376	Ros1	0.00802	-1.39821	up
A_55_P2779016	Gm30421	0.000249	-1.39848	up
A_55_P2729743	C530005A16Rik	0.0404	-1.39974	up
A_55_P2241663	5830432E09Rik	0.0287	-1.40019	up
A_55_P2044932	Gpr84	0.0283	-1.4017	up
A_55_P2200034	Dleu2	0.00543	-1.40338	up
A_52_P891296	Gpr174	0.00891	-1.4056	up
A_66_P112353	Gm36738	0.00441	-1.40613	up
A_55_P2731401	Snx14	0.0317	-1.40687	up
A_52_P198837	Ccdc171	0.0256	-1.40764	up
A_55_P2107696	Mrgpra6	0.0037	-1.40778	up
A_51_P379807	Cyp4f41-ps	0.00801	-1.41248	up
A_66_P101051	8030442B05Rik	0.00806	-1.41272	up
A_55_P2935450	Prdm16os	0.00149	-1.41308	up
A_55_P2713670	Zswim9	0.0133	-1.41329	up
A_55_P2737069	Rap1gds1	0.00409	-1.4282	up
A_55_P2503626	Dnai4	0.0041	-1.42993	up
A_52_P33202	Shisa3	0.00518	-1.43117	up
A_55_P2593238	Clec9a	0.000812	-1.43216	up
A_55_P2104835	P2rx4	0.0029	-1.43295	up
A_52_P154026	Zcwpw1	0.0421	-1.43953	up
A_52_P349844	Obscn	0.0222	-1.44012	up
A_52_P828218	Olfm4	0.00115	-1.44696	up
A_55_P2831999	Plaat1	0.000381	-1.44743	up
A_51_P350817	Cnn1	0.00113	-1.4489	up
A_52_P351173	Fam185a	0.00192	-1.4511	up
A_52_P518087	A230107N01Rik	0.0146	-1.4519	up
A_55_P1954648	Siglec1	0.00242	-1.45287	up
A_66_P126136	Gm11998	0.0272	-1.45513	up
A_51_P169032	2810004N23Rik	0.0155	-1.45551	up
A_55_P2738807	Psd4	0.00957	-1.45764	up
A_55_P2508548	Gm15910	0.000248	-1.46231	up
A_55_P2269814	4933411E08Rik	8.08e-06	-1.46477	up
A_66_P132843	E330020D12Rik	0.0125	-1.46484	up
A_51_P219041	Gm12977	0.00013	-1.46719	up
A_52_P373504	Clasp2	0.000406	-1.46802	up
A_55_P2273959	G930009F23Rik	0.0412	-1.46992	up
A_55_P1957453	Best3	0.023	-1.47523	up
A_52_P223407	Mrpl35	0.00569	-1.47581	up
A_66_P115682	Tectb	0.000129	-1.48672	up
A_65_P01584	Meg3	9.22e-05	-1.48729	up
A_52_P563450	Brix1	0.00711	-1.48734	up
A_55_P2557883	Gm32092	0.0079	-1.49451	up
A_66_P111334	E030013I19Rik	0.0186	-1.49612	up
A_55_P2500722	Klf10	0.0279	-1.5044	up
A_55_P1996290	Mm2pr	0.0153	-1.50516	up
A_55_P2509073	B430010I23Rik	0.0117	-1.50742	up
A_55_P2388118	Gm5089	0.0123	-1.518	up
A_51_P185292	4930581F22Rik	0.00352	-1.51813	up
A_52_P330868	Gm8579	0.0211	-1.52807	up
A_55_P2073552	A930003A15Rik	0.00231	-1.53436	up
A_55_P2834529	Dexi	0.00553	-1.5378	up
A_52_P99810	Cx3cr1	0.0204	-1.53943	up
A_52_P220370	Ankle1	0.0211	-1.53999	up
A_52_P249514	Ccl12	0.00166	-1.54218	up
A_55_P2726186	Gm30255	0.0122	-1.5568	up
A_66_P131851	Kcnmb1	0.000814	-1.56583	up
A_66_P118356	Smim4	0.00936	-1.5678	up
A_55_P2592020	Ccdc62	0.000203	-1.56802	up
A_52_P658479	Lhb	0.00193	-1.57074	up
A_52_P204864	Cdca2	0.00993	-1.57594	up
A_55_P2741258	Prok2	0.0165	-1.59016	up
A_52_P387189	Lyrm7	0.001	-1.59075	up
A_55_P2744262	Krtdap	0.000305	-1.59167	up
A_52_P793792	Gad1os	0.015	-1.59176	up
A_52_P508221	Rmi2	5.69e-05	-1.60461	up
A_51_P213359	Has2	0.0113	-1.60688	up
A_55_P2728852	Cfap20dc	0.000446	-1.6106	up
A_55_P2727674	Fmn2	0.0032	-1.61267	up
A_55_P2347906	B230303A05Rik	0.00754	-1.62102	up
A_55_P2178991	9030404E10Rik	0.00361	-1.62702	up
A_52_P448870	Rab26	0.0168	-1.63631	up
A_51_P178114	Ephx3	0.00194	-1.63857	up
A_52_P286360	Otc	0.0475	-1.63933	up
A_52_P520607	Ankrd22	0.0214	-1.64233	up
A_66_P124545	D630024D03Rik	0.00627	-1.64322	up
A_51_P279666	A230056P14Rik	6.89e-05	-1.64403	up
A_51_P221176	Ttc21b	0.00806	-1.66208	up
A_52_P605253	Pcdhga12	0.0013	-1.66266	up
A_55_P2098643	Gm10252	0.0101	-1.66821	up
A_66_P100165	Serpini1	0.000124	-1.66832	up
A_65_P05044	Dtl	0.00411	-1.67005	up
A_55_P2006852	Dgkb	0.0018	-1.68843	up
A_55_P2754214	Gm30984	0.0183	-1.68847	up
A_51_P509573	Ccl4	0.013	-1.69363	up
A_51_P444290	Slamf8	0.0001	-1.69682	up
A_66_P110122	Vwa3b	0.0284	-1.71369	up
A_55_P2567662	6430550D23Rik	0.000608	-1.71461	up
A_66_P137954	Gm34471	0.000839	-1.72334	up
A_55_P2488339	Rslcan18	0.00135	-1.72616	up
A_66_P110435	Unc80	0.000933	-1.74071	up
A_55_P2216976	D13Ertd608e	0.00566	-1.74315	up
A_51_P234956	Xcl1	0.0305	-1.74431	up
A_55_P2501319	Ptprt	0.00349	-1.74511	up
A_55_P1992222	2610203C22Rik	0.019	-1.74714	up
A_66_P117844	Gm30695	4.1e-05	-1.75792	up
A_55_P2101055	Alpk1	0.00317	-1.76289	up
A_55_P2402577	Gm15850	0.00315	-1.7709	up
A_66_P131803	1700016D02Rik	0.0268	-1.77433	up
A_55_P2787986	Egr3	0.0235	-1.77514	up
A_55_P1974063	Gm2545	0.00346	-1.78313	up
A_55_P2447154	Pcdhga5	0.00108	-1.79675	up
A_55_P2728738	Agbl3	0.0219	-1.79923	up
A_55_P2491803	Gmnc	0.00648	-1.80021	up
A_51_P490633	Gm34643	0.00348	-1.8108	up
A_52_P401504	Thbs4	0.0271	-1.81326	up
A_52_P61697	9930111J21Rik2	0.000257	-1.81701	up
A_55_P2741047	Klra17	0.03	-1.85269	up
A_55_P2766239	Rbm3	0.031	-1.86787	up
A_52_P32886	AI256396	0.000712	-1.91235	up
A_55_P2733582	Gm12708	0.00266	-1.92903	up
A_55_P1972638	Gm15340	0.00185	-1.93548	up
A_66_P110953	Frem2	0.000262	-1.93769	up
A_52_P1147844	Knl1	3.63e-05	-1.94925	up
A_55_P2768796	Gm35933	0.0166	-1.95766	up
A_55_P1960376	Cd209e	0.00629	-1.96193	up
A_52_P401535	Cd209d	0.00138	-1.99402	up
A_66_P117541	Gm26748	0.0119	-2.01867	up
A_55_P2161595	Hpca	0.000134	-2.05425	up
A_55_P2163085	Gm10220	0.00162	-2.06151	up
A_51_P520306	Alox12	0.000957	-2.07211	up
A_52_P404329	Saa4	2.12e-05	-2.14634	up
A_55_P2508578	1700001G11Rik	0.000619	-2.16473	up
A_55_P2729383	Sfpq	0.00539	-2.17484	up
A_55_P2004708	Mrgpra7	0.0048	-2.18203	up
A_52_P149545	Tacr1	0.0164	-2.1824	up
A_55_P2509043	1700071M16Rik	0.000593	-2.19523	up
A_66_P109708	Il36a	0.00475	-2.24801	up
A_55_P2071716	Klre1	0.0185	-2.28841	up
A_55_P2731446	Gm10378	0.0372	-2.34805	up
A_51_P101146	Serpinb2	0.0127	-2.43593	up
A_55_P2065364	Tdrkh	0.0119	-2.50593	up
A_55_P2579562	Gm34552	0.00506	-2.54951	up
A_55_P2563794	Gm36774	0.00175	-3.04975	up
